# Supplementary material for: Regional disparities in interferon therapy for chronic hepatitis C in Japan: a nationwide retrospective cohort study
Source: Springer Nature journal article supplement (doi:10.1186/s12889-015-1891-2), 2015-06-18
Supplement: MOESM1 [file 9749608]

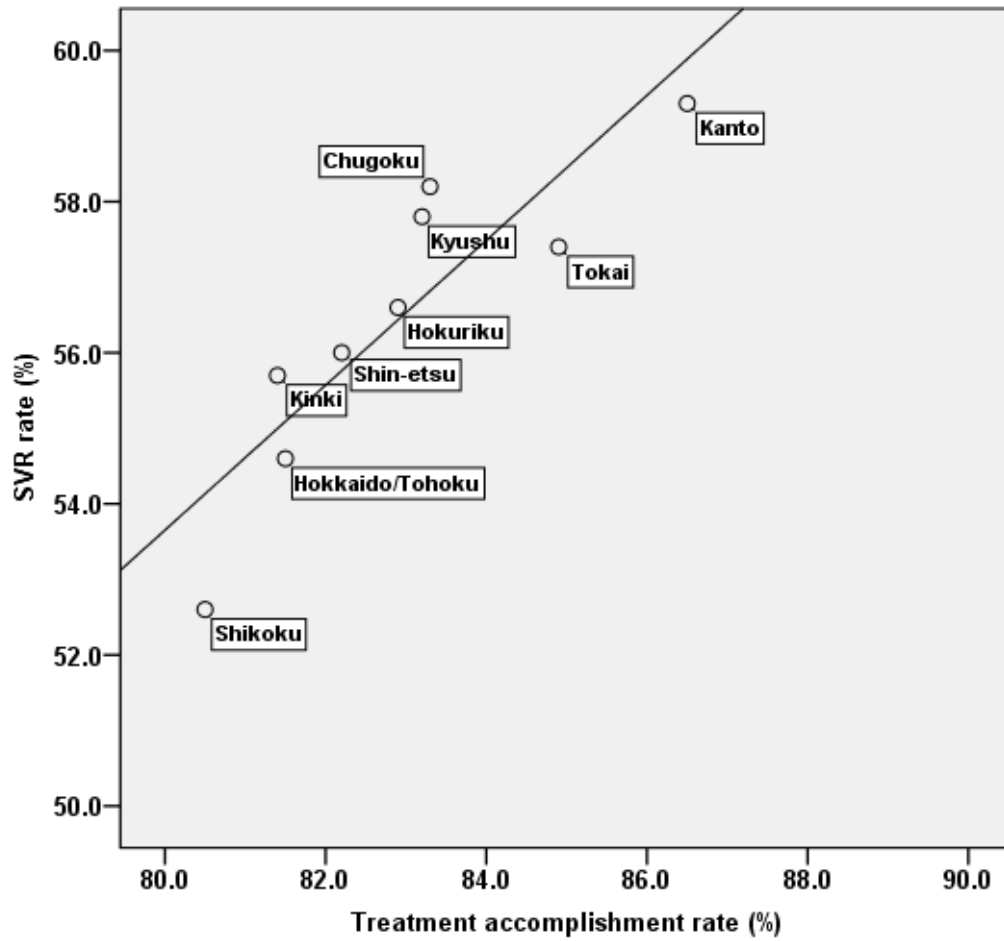

**Additional Figure 1. Correlation between treatment accomplishment and sustained virological response (SVR) rates in patients treated by peginterferon- $\alpha$  and ribavirin in nine regions of Japan.** SVR rates were strongly correlated with the rates of treatment accomplishment ( $r = 0.879$ ,  $P = 0.002$ ).
