# Supplementary material for: Regional disparities in interferon therapy for chronic hepatitis C in Japan: a nationwide retrospective cohort study
Source: Springer Nature journal article supplement (doi:10.1186/s12889-015-1891-2), 2015-06-18
Supplement: MOESM2 [file 9749608]

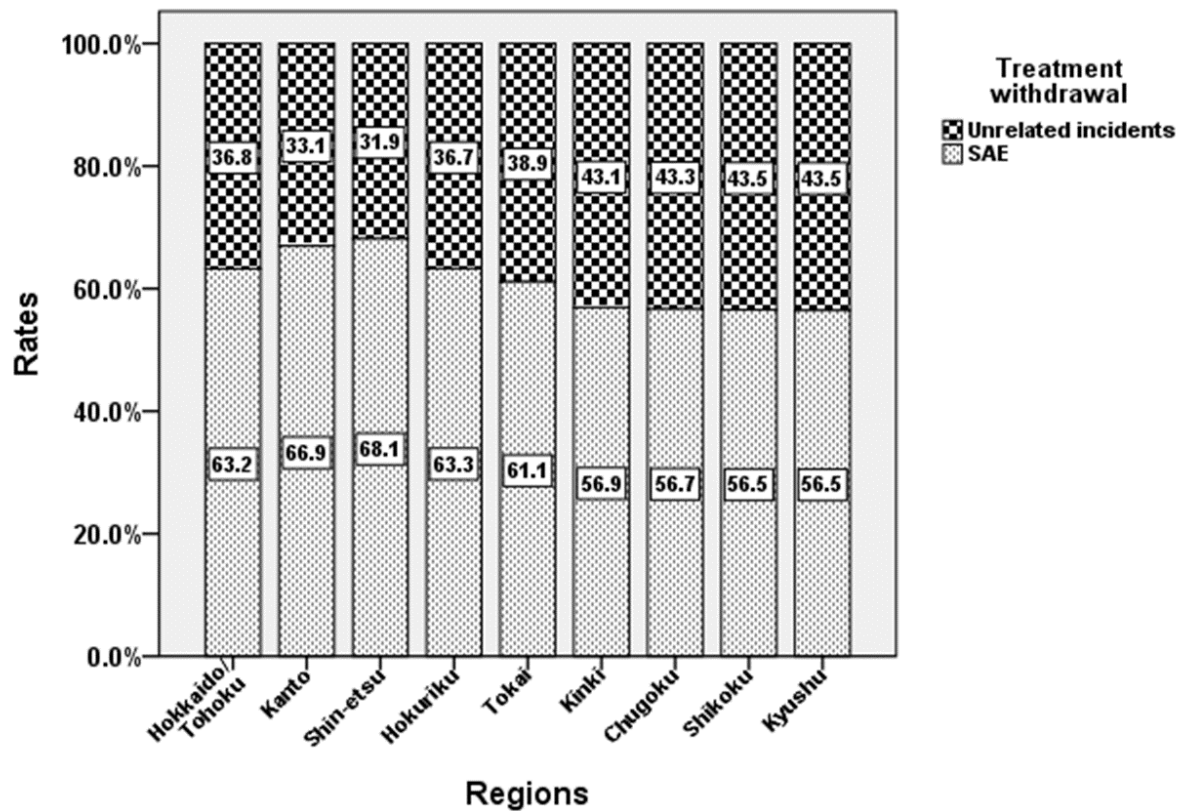

**Additional Figure 2. Rates of severe adverse events (SAE) and unrelated incidents among the reasons for withdrawal of peginterferon- $\alpha$  and ribavirin therapy.** There was no regional difference among nine regions of Japan ( $P = 0.075$ ).
