# Supplementary material for: Regional disparities in interferon therapy for chronic hepatitis C in Japan: a nationwide retrospective cohort study
Source: Springer Nature journal article supplement (doi:10.1186/s12889-015-1891-2), 2015-06-18
Supplement: MOESM3 [file 9749608]

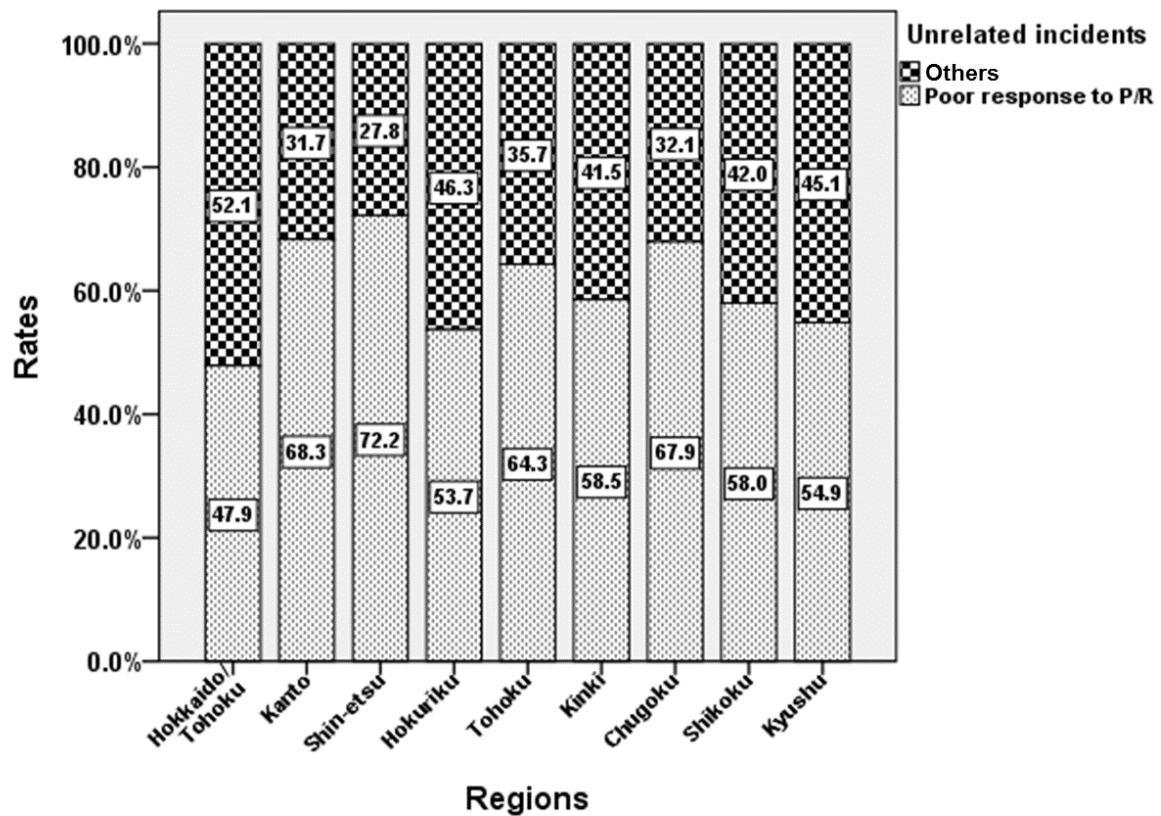

**Additional Figure 3. Rates of poor response to peginterferon- $\alpha$  and ribavirin (P/R) and other agents as reasons for treatment withdrawal because of unrelated incidents.** The proportion of patients with poor response to P/R, according to criteria for response-guided therapy differed among nine regions of Japan ( $P = 0.019$ ). In Hokkaido/Tohoku the proportion was the lowest.
