# Supplementary material for: Regional disparities in interferon therapy for chronic hepatitis C in Japan: a nationwide retrospective cohort study
Source: Springer Nature journal article supplement (doi:10.1186/s12889-015-1891-2), 2015-06-18
Supplement: MOESM4 [file 9749608]

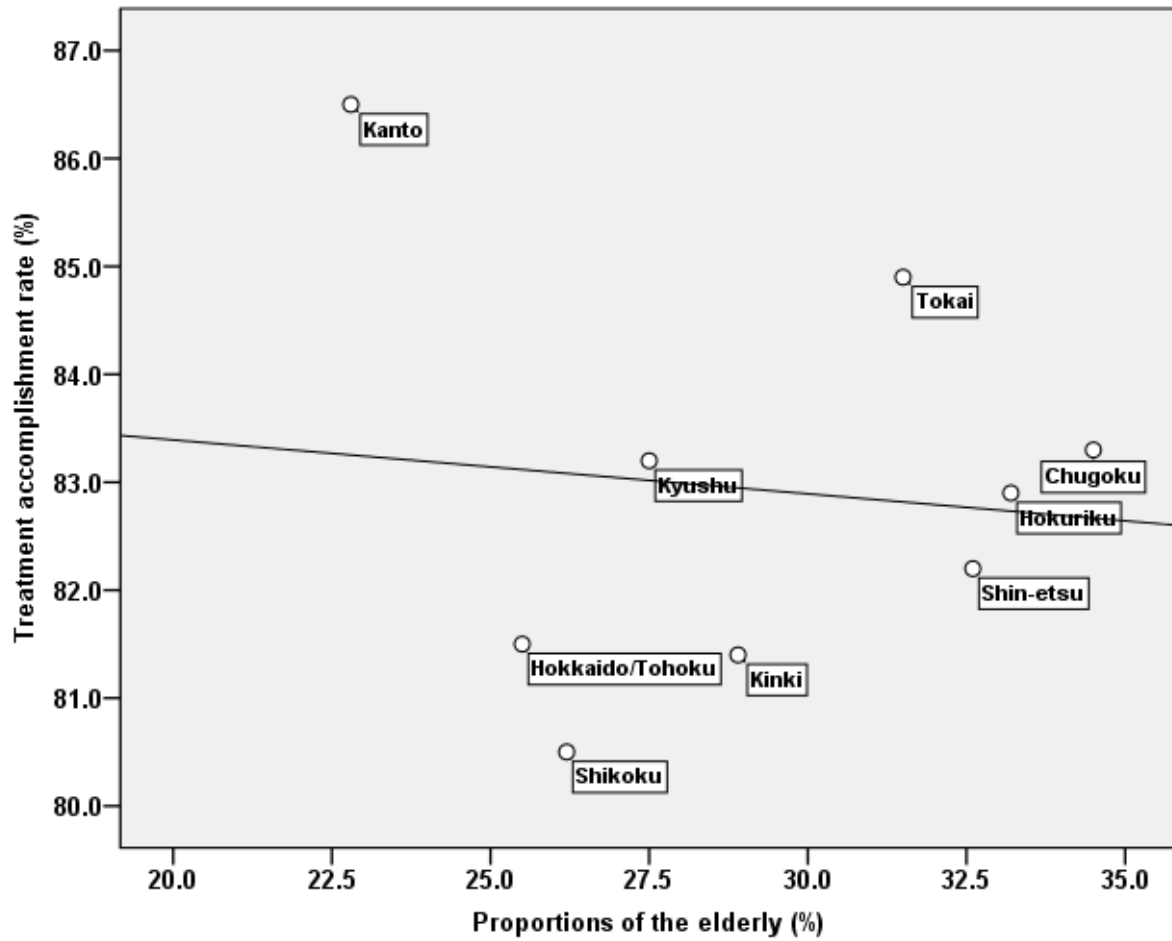

**Additional Figure 4. Proportions of elderly patients and treatment accomplishment rate for peginterferon- $\alpha$  and ribavirin in nine regions of Japan.** No correlation was found between the proportions of elderly patients and treatment accomplishment rate ( $r = -0.107$ ,  $P = 0.783$ ).
