# Supplementary material for: Regional disparities in interferon therapy for chronic hepatitis C in Japan: a nationwide retrospective cohort study
Source: Springer Nature journal article supplement (doi:10.1186/s12889-015-1891-2), 2015-06-18
Supplement: MOESM6 [file 9749608]

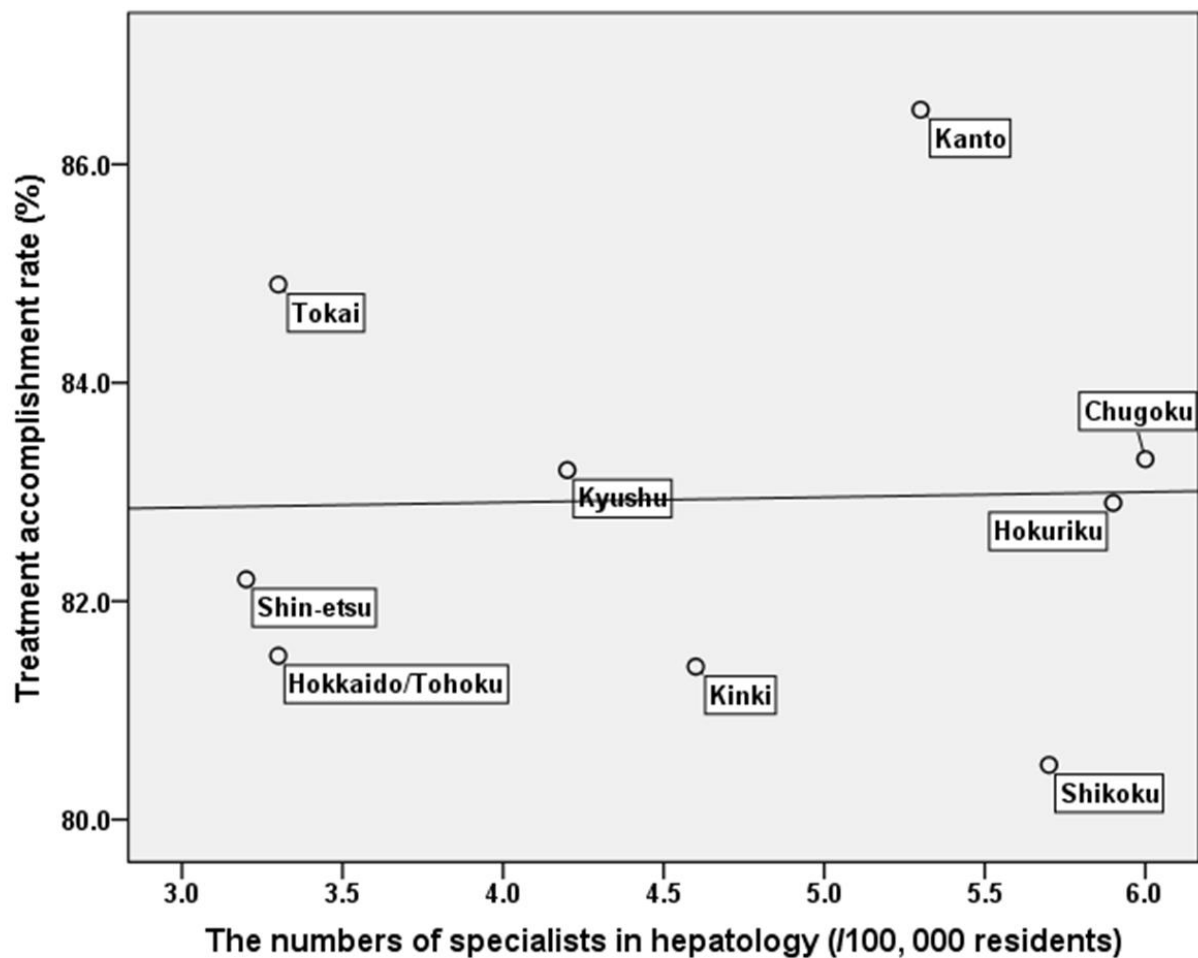

**Additional Figure 6. Numbers of specialists in hepatology and treatment accomplishment rate in patients treated by peginterferon- $\alpha$  and ribavirin in nine regions of Japan.** No correlation was found between these two parameters ( $r = 0.030$ ,  $P = 0.939$ ).
